# Supplementary material
Source: publisher figshare collection journal article supplement (https://gsajournals.figshare.com/ndownloader/files/25117364)
Supplement: Supplementary file 1 [file 25117364]

## Sheet: Sheet1
Table S2. Strains used in this study
Strain Name	Genotype	Source
N2	N2: wild-type	Caenorhabditis Genetics Center
RF931	mir-45(xw11[gfp^3xFlag]) mir-42/44(nDf49) II	This study
RF1094	mir-45(xw8) mir-44(xw19[gfp^3xFlag]) II	This study
RW10027	stIs10027 [his-72 1kb::HIS-72::GFP; unc-119(+)]	Gift from Hong Zhang
RF980	mir-45 (xw11) mir-42/44 (nDf49) II; stIs10027 [his-72 1kb::HIS-72::GFP; unc-119(+)]	This study
RF1097	mir-45(xw8) mir-44(xw19) II; stIs10027	This study
RF1014	mir-45(xw11[gfp^3xFlag]) mir-42/44(nDf49) II; him-8(e1489) IV; stIs10027	This study
RF1098	mir-45(xw8) mir-44(xw19) II; him-8(e1489) IV; stIs10027	This study
RF920	mir-44(xw6[gfp^3xFlag]) II	This study
RF932	mir-45(xw8[gfp^3xFlag]) II	This study
RF1038	fbf-1(ok91) II; stIs10027 [his-72 1kb::HIS-72::GFP; unc-119(+)]	This study. JK3022 parent from Caenorhabditis Genetics Center
RF1039	mir-45(xw11) mir-42/44(nDf49) fbf-1(ok91) II; stIs10027 [his-72 1kb::HIS-72::GFP; unc-119(+)]	This study
RF1093	fem-3(q20) IV; stIs10027	This study. Parent available from Caenorhabditis Genetics Center
RF1088	mir-45(xw11) mir-42/44(nDf49) II; fem-3(q20) IV; stIs10027	This study
RF1087	fog-1(q253) I; stIs10027	This study. JK560 parent from Caenorhabditis Genetics Center
RF1086	fog-1 (q253) I; mir-45(xw11) mir-42/44(nDf49) II; stIs10027	This study
JK5187	fog-1(q785) I; qSi140 [3xMyc::fog-1 + unc-119(+)] IV	Gift from Judith Kimble
RF1050	fog-1(q785) I; mir-45(xw11) mir-42/44(nDf49) II; qSi140 [3xMyc::fog-1 + unc-119(+)] IV	This study
RF963	oxTi302 [eft-3p::mCherry::tbb-2 3'UTR + Cbr-unc-119(+)] I; him-8(e1489) IV	This study. EG8040 parent from Caenorhabditis Genetics Center
VL99	unc-119(ed3) III; wwIs10 [mir-45p::GFP + unc-119(+)]	Caenorhabditis Genetics Center
VL188	unc-119(ed3) III; wwEx26 [mir-42-44p::GFP + unc-119(+)]	Caenorhabditis Genetics Center
RF887	mir-42/44(nDf49) II	This study. Parent available from Caenorhabditis Genetics Center
MT13433	mir-45(n4280) II	Available from Caenorhabditis Genetics Center
MT14875	mir-61/250(nDf59) V	Available from Caenorhabditis Genetics Center
RF24	mir-247(n4505) X	Available from Caenorhabditis Genetics Center
RF1000	mir-42/44(nDf49) II; mir-61/250(nDf59) V	This study
RF1028	mir-42/44(nDf49) II; mir-247(n4505) X	This study
RF889	mir-45(n4280); mir-61/250(nDf59)	This study
RF1003	mir-45(n4280) II; mir-247(n4505) X	This study
RF1029	mir-61(nDf59) V; mir-247(n4505) X	This study
RF945	mir-45(xw11[gfp^3xFlag]) mir-42/44(nDf49) II; mir-61/250(nDf59) V	This study
RF947	mir-42/44(nDf49) mir-45(xw11[gfp^3xFlag]) II; mir-247(n4505) X	This study
MT17431	mir-42/44(nDf49) II; mir61/250(nDf59) V; mir-247(n4505) X	Available from Caenorhabditis Genetics Center
MT17676	mir-45(n4280) II; mir-61/250(nDf59) V; mir-247(n4505) X	Available from Caenorhabditis Genetics Center
RF955	mir-45(xw11) mir-42/44(nDf49) II; mir-61/250(nDf59) V; mir-247(n4505) X	This study
